# Supplementary material for: Conditions to Control Furan Ring Opening during Furfuryl Alcohol Polymerization
Source: MDPI journal article supplement (doi:10.3390/molecules27103212), 2022-05-17
Supplement: s1 [file s1]

## Supplementary materials

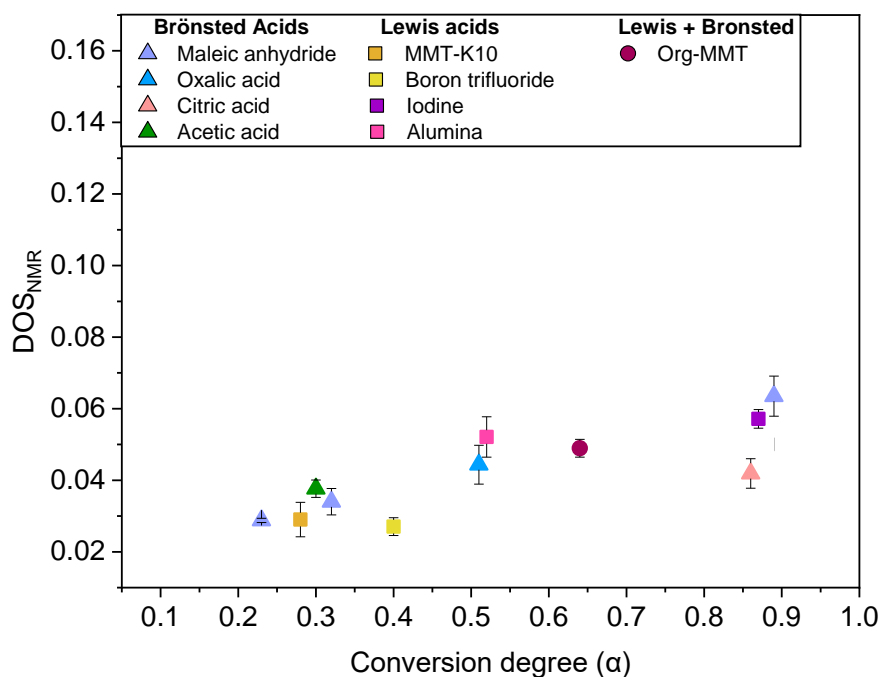

**Figure S1.** Comparison of the degree of open structures obtained from  $^{19}\text{F}$  NMR method synthesized with different initiators in function of the conversion degree.

**Table S1.** Index of the results of the different initiators used without water.

| Initiator         | Acid type        | $\text{DOS}_{\text{NMR}} / \text{DOS}_{\text{Titri}}$ | $\text{DOS}_{\text{Titri}}$ | $\text{DOS}_{\text{NMR}}$ | $\alpha$ | FTIR C=O area |
|-------------------|------------------|-------------------------------------------------------|-----------------------------|---------------------------|----------|---------------|
| Citric acid       | Bronsted         | 0.68                                                  | 0.061                       | 0.042                     | 0.86     | 17.9          |
| Oxalic acid       | Bronsted         | 0.93                                                  | 0.047                       | 0.044                     | 0.51     | 8.50          |
| Nitric acid       | Bronsted         | 0.63                                                  | 0.108                       | 0.068                     | 0.4      | 8.07          |
| Acetic acid       | Bronsted         | 0.37                                                  | 0.078                       | 0.029                     | 0.3      | 9.5           |
| Maleic anhydride  | Bronsted         | 0.70                                                  | 0.092                       | 0.064                     | 0.89     | 21.05         |
| Maleic anhydride  | Bronsted         | 0.54                                                  | 0.054                       | 0.029                     | 0.23     | 5             |
| Maleic anhydride  | Bronsted         | 0.60                                                  | 0.057                       | 0.034                     | 0.32     | 6.1           |
| Org-MMT 2 wt%     | Lewis / Bronsted | 0.67                                                  | 0.030                       | 0.020                     | 0.53     | 2.33          |
| Org-MMT 2 wt%     | Lewis / Bronsted | 0.52                                                  | 0.095                       | 0.049                     | 0.64     | 11.53         |
| Org-MMT 1 wt%     | Lewis / Bronsted | 0.53                                                  | 0.040                       | 0.021                     | 0.14     | 3.85          |
| MMT K10 2 wt%     | Lewis            | 0.39                                                  | 0.075                       | 0.029                     | 0.28     | 7.39          |
| Boron trifluoride | Lewis            | 0.48                                                  | 0.056                       | 0.027                     | 0.4      | 5.86          |
| Alumina           | Lewis            | 0.55                                                  | 0.094                       | 0.052                     | 0.51     | 30.39         |
| Iodine            | Lewis            | 0.78                                                  | 0.073                       | 0.057                     | 0.87     | 19.13         |

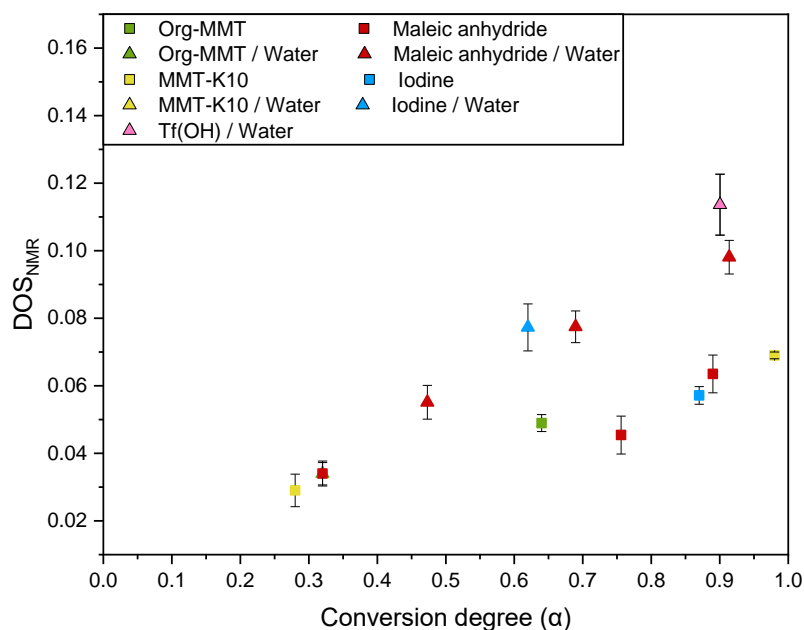

**Figure S2.** Comparison of the degree of open structures obtained  $^{19}\text{F}$  NMR method and synthesized with different initiators with and without additional water (50 % w/w) in function of the conversion degree.

**Table S2.** Index of the results of the different initiators used without water.

| Conditions                  | Acid type        | $DOS_{NMR} / DOS_{Titri}$ | $DOS_{Titri}$ | $DOS_{NMR}$ | $\alpha$ | IR area |
|-----------------------------|------------------|---------------------------|---------------|-------------|----------|---------|
| Maleic anhydride neat       | Brönsted         | 0.60                      | 0.057         | 0.034       | 0.32     | 6.1     |
| Maleic anhydride neat       | Brönsted         | 0.54                      | 0.083         | 0.045       | 0.76     | 13.48   |
| Maleic anhydride neat       | Brönsted         | 0.70                      | 0.092         | 0.064       | 0.89     | 21.05   |
| Maleic anhydride with water | Brönsted         | 0.71                      | 0.077         | 0.055       | 0.47     | 8       |
| Maleic anhydride with water | Brönsted         | 0.73                      | 0.107         | 0.078       | 0.69     | 12.15   |
| Maleic anhydride with water | Brönsted         | 0.71                      | 0.139         | 0.098       | 0.91     | 25.96   |
| Org-MMT (2 wt %) neat       | Lewis / Brönsted | 0.52                      | 0.095         | 0.049       | 0.64     | 11.53   |
| Org-MMT (2 wt %) with water | Lewis / Brönsted | 0.49                      | 0.069         | 0.034       | 0.32     | 2.33    |
| Iodine neat                 | Lewis            | 0.91                      | 0.073         | 0.057       | 0.87     | 19.13   |
| Iodine with water           | Lewis            | 0.78                      | 0.099         | 0.077       | 0.62     | 16.88   |
| MMT-K10 neat                | Lewis            | 0.41                      | 0.071         | 0.029       | 0.28     | 7.39    |
| MMT-K10 with water          | Lewis            | 0.56                      | 0.123         | 0.069       | 0.98     | 12.53   |

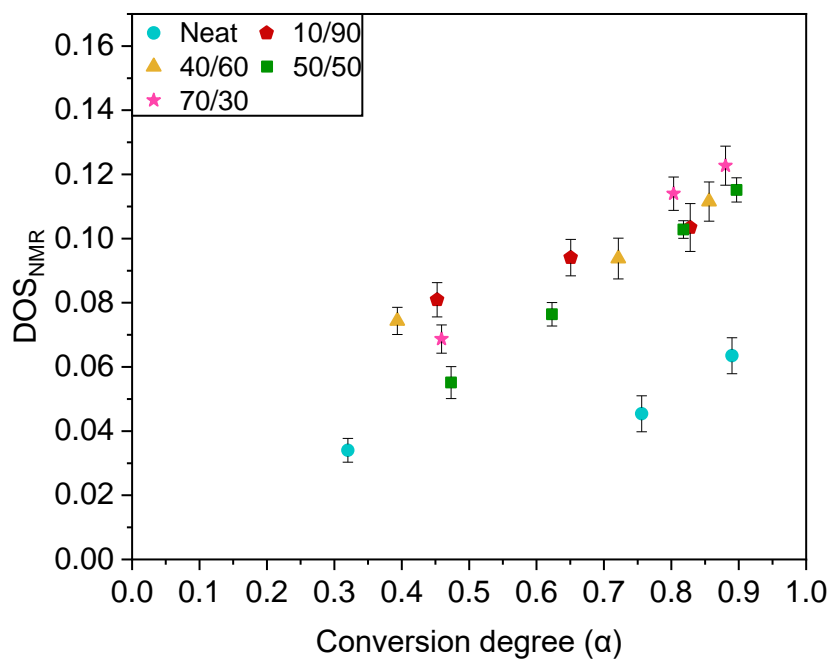

**Figure S3.** Comparison of the degree of open structures obtained with  $^{19}\text{F}$  NMR method and synthesized with different FA/Additional water ratios with in function of the conversion degree.

**Table S3.** Index of the results of the different FA/additional water ratios used with maleic anhydride.

| FA/ Water ratio (w/w) | $\text{DOS}_{\text{NMR}} / \text{DOS}_{\text{Titr}}$ | $\text{DOS}_{\text{Titr}}$ | $\text{DOS}_{\text{NMR}}$ | $\alpha$ | IR area |
|-----------------------|------------------------------------------------------|----------------------------|---------------------------|----------|---------|
| Neat                  | 0.60                                                 | 0.057                      | 0.034                     | 0.32     | 6.1     |
| Neat                  | 0.54                                                 | 0.083                      | 0.045                     | 0.76     | 13.48   |
| Neat                  | 0.70                                                 | 0.092                      | 0.064                     | 0.89     | 21.05   |
| 70/30                 | 0.75                                                 | 0.099                      | 0.074                     | 0.39     | 11.24   |
| 70/30                 | 0.75                                                 | 0.126                      | 0.094                     | 0.72     | 15.6    |
| 70/30                 | 0.72                                                 | 0.156                      | 0.112                     | 0.86     | 21.89   |
| 50/50                 | 0.71                                                 | 0.077                      | 0.055                     | 0.47     | 8       |
| 50/50                 | 0.73                                                 | 0.107                      | 0.078                     | 0.69     | 12.15   |
| 50/50                 | 0.71                                                 | 0.139                      | 0.098                     | 0.91     | 25.96   |
| 40/60                 | 0.74                                                 | 0.093                      | 0.069                     | 0.46     | 10.46   |
| 40/60                 | 0.93                                                 | 0.123                      | 0.114                     | 0.80     | 16.94   |
| 40/60                 | 0.82                                                 | 0.150                      | 0.123                     | 0.88     | 20.26   |
| 10/90                 | 0.702                                                | 0.115                      | 0.081                     | 0.45     | 12.97   |
| 10/90                 | 0.710                                                | 0.132                      | 0.094                     | 0.65     | 19.9    |
| 10/90                 | 0.665                                                | 0.155                      | 0.103                     | 0.83     | 32      |
